# Supplementary material for: SPNS1 variants cause multiorgan disease and implicate lysophospholipid transport as critical for mTOR-regulated lipid homeostasis
Source: JCI journal article supplement (doi:10.1172/jci193099), 2025-07-03
Supplement: sd3 [file 3]

## Supplementary Table 1

### Summary of Clinical and laboratory findings

| <b><u>Patient :</u></b>                            | <b><u>Skeletal muscle:</u></b>                                                                                                                                                                                                                                                                                                                                                                                                           | <b><u>Heart:</u></b>                                                                                                                               | <b><u>Liver:</u></b>                                                                                                                                                                                                                                                                                                                                                                                                                                                                     | <b><u>CNS:</u></b>                                                                       |
|----------------------------------------------------|------------------------------------------------------------------------------------------------------------------------------------------------------------------------------------------------------------------------------------------------------------------------------------------------------------------------------------------------------------------------------------------------------------------------------------------|----------------------------------------------------------------------------------------------------------------------------------------------------|------------------------------------------------------------------------------------------------------------------------------------------------------------------------------------------------------------------------------------------------------------------------------------------------------------------------------------------------------------------------------------------------------------------------------------------------------------------------------------------|------------------------------------------------------------------------------------------|
| Family A,<br>Patient A.II.1:<br>Male, born<br>2008 | Proximal, axial, pharyngeal, and distal weakness in upper extremities, abdomen, hands. Increased fatiguability. Cannot walk on heels. Difficulty to swallow. Slight scoliosis (Cobb angle 17°).<br><br>p-CK 1200-2400 U/L (2-5 times upper normal reference level)<br>p-Myoglobin 646-803 µg/L (9 -11 times upper normal reference level). EMG normal.<br><br>Muscle biopsy: normal morphology. No increase of lysosomes or peroxisomes. | Echocardiography: Increased trabeculation left ventricle. Discrete left ventricle hypertrophy. Normal systolic and diastolic function. ECG normal. | Neonatal transient non-conjugated hyperbilirubimemia.<br>s-ALAT 480-660 U/L (16-21 times upper normal reference level).<br>s-ASAT 412-509 U/L<br>Liver scan: slight to medium fibrosis. Normal values of p-ALP, p-albumin, p-bilirubin, PK, APTT, p-GT.<br><br>Liver biopsy: normal morphology. No deposits of glycogen or other material. Electron microscopy: Increased and dilated ER. Disrupted structure of mitochondrial cristae. Deranged mitochondria with crystalline deposits. | Attention deficit disorder (ADD). Cognitive skills at lower average to borderline range. |
| Family A,<br>Patient A.II.2:<br>Male, born<br>2016 | Increased fatiguability. Normal gross motor function.<br><br>p-CK 420-1500 U/L (1-3 times upper normal reference level)<br><br>Muscle biopsy not performed.                                                                                                                                                                                                                                                                              | Echocardiography: discrete signs increased trabeculation left ventricle. Normal systolic and diastolic function. ECG normal.                       | s-ALAT: 240-540 U/L (8-17 times upper normal reference level).<br>Normal values of p-ALP, p-albumin, p-bilirubin, PK, APTT, p-GT.<br><br>Ultrasound liver normal.<br>Liver biopsy not performed.                                                                                                                                                                                                                                                                                         | Late language development.                                                               |

|                                                  |                                                                                        |                                                                                                                                                                                                                                                                                       |                                                                                                                                                        |                                                                                                                                                                                |
|--------------------------------------------------|----------------------------------------------------------------------------------------|---------------------------------------------------------------------------------------------------------------------------------------------------------------------------------------------------------------------------------------------------------------------------------------|--------------------------------------------------------------------------------------------------------------------------------------------------------|--------------------------------------------------------------------------------------------------------------------------------------------------------------------------------|
| Family B,<br>Patient 3<br>Male, Born<br>Dec 2016 | p-CK: 700-1000U/L<br>LDH:1200-1500U/L<br>Myoglobin: 481<br>Muscle biopsy not preformed | Prenatal suspicion of<br>anomalous pulmonary vein<br>opening<br>Cardiac ultrasound after birth<br>showed dilated superior Vena<br>cava, cardiomegaly with<br>large coronary arteries, a<br>large PDA, a small aortic<br>isthmus stenosis but was<br>normal in the subsequent<br>visit | Elevation of transaminase first noted at age<br>of 2.5 years old<br>p-ALAT: 220-640U/L<br>p-ASAT:150-370U/L<br><br>Ultrasound liver showed hepatopathy | At age of 3, lower<br>vocabulary (approx.<br>10 Words)<br>Slightly hypotonic,<br>increased patellar<br>stretch reflex on both<br>sides<br>Inconspicuous EEG<br>and cranial MRI |
|--------------------------------------------------|----------------------------------------------------------------------------------------|---------------------------------------------------------------------------------------------------------------------------------------------------------------------------------------------------------------------------------------------------------------------------------------|--------------------------------------------------------------------------------------------------------------------------------------------------------|--------------------------------------------------------------------------------------------------------------------------------------------------------------------------------|
